# Supplementary material for: 24/7 workflow for bloodstream infection diagnostics in microbiology laboratories: the first step to improve clinical management
Source: publisher site journal article supplement (doi:10.1515/cclm-2022-0667), 2022-11-03
Supplement: Supplementary file 1 [file j_cclm-2022-0667_suppl_001.docx]

**Table S3. Patient and infection characteristics according to empirical antibiotic therapy**

|  | Empirical antibiotic  therapy | | No empirical antibiotic therapy |
| --- | --- | --- | --- |
| Patient characteristics | n=417 (%) | n=131 | |
| Mean age (years) | 70,2 | 69,9 | |
| ICU admissiona | 58 (13.9) | 5 (3.8) | |
| Patient death | 59 (14.1) | 13 (9.9) | |
| Infection characteristics |  |  | |
| Gram-negative bacteria | 303 (72.7) | 76 (58.0) | |
| *Escherichia coli* | 173 (41.5) | 36 (27.5) | |
| Group 2 enterobacteriaceae | 65 (15.6) | 15 (11.5) | |
| Group 3 enterobacteriaceae | 24 (5.8) | 17 (13.0) | |
| Anaerobic bacteria | 20 (4.8) | 4 (3.1) | |
| *Pseudomonas* spp | 17 (4.1) | 3 (2.3) | |
| Other gram-negative bacteria | 4 (1.0) | 1 (0.8) | |
| Gram-positive bacteria | 114 (27.3) | 55 (42.0) | |
| *Staphylococcus aureus* | 56 (13.4) | 27 (20.6) | |
| *Streptococcus* spp | 40 (9.6) | 15 (11.5) | |
| *Enterococcus* spp | 15 (3.6) | 10 (7.6) | |
| Other gram-positive bacteria | 3 (0.7) | 3 (2.3) | |
| Underlying infection |  |  | |
| Genito-urinary | 167 (40.0) | 31 (23.7) | |
| Intra-abdominal | 93 (22.3) | 25 (19.1) | |
| Catheter related | 44 (10.6) | 19 (14.5) | |
| Unknownb | 35 (8.4) | 20 (15.3) | |
| Cutaneousc | 29 (7.0) | 16 (12.2) | |
| Respiratory | 24 (5.8) | 3 (2.3) | |
| Endocarditis | 14 (3.4) | 12 (9.2) | |
| Bone and Joint | 7 (1.7) | 3 (2.3) | |
| Otherd | 4 (1.0) | 2 (1.5) | |

ICU: intensive care unit

a refers to patients who required intensive care at bloodstream infection onset.

b refers to bacteremia without evidence for any underlying infection or apparent source.

c including surgical site infections, skin and soft tissue infections and bacteremia from wounds and bed sores.

d includes bacteremia following dental infections and meningitis.
